# Supplementary material for: 3-Amino-5-(indol-3-yl)methylene-4-oxo-2-thioxothiazolidine Derivatives as Antimicrobial Agents: Synthesis, Computational and Biological Evaluation
Source: Pharmaceuticals (Basel). 2020 Sep 1;13(9):229. doi: 10.3390/ph13090229 (PMC7559366; doi:10.3390/ph13090229)
Supplement: Supplementary file 1 [file pharmaceuticals-13-00229-s001.xlsx]

## Sheet: AntiBac
Compound	Name	Confidence	ChEMBL ID
81	Bacillus subtilis subsp. subtilis str. 168	0.3093	CHEMBL613315
48	Bacillus subtilis subsp. subtilis str. 168	0.3053	CHEMBL613315
132	Bacillus subtilis subsp. subtilis str. 168	0.3049	CHEMBL613315
121	Bacillus subtilis subsp. subtilis str. 168	0.2865	CHEMBL613315
116	Bacillus subtilis subsp. subtilis str. 168	0.286	CHEMBL613315
48	Streptococcus mutans	0.2485	CHEMBL612426
82	Shigella sp.	0.2445	CHEMBL614397
82	RESISTANT Staphylococcus simulans	0.2221	CHEMBL612425
132	Streptococcus mutans	0.2174	CHEMBL612426
81	Streptococcus mutans	0.2166	CHEMBL612426
116	Streptococcus mutans	0.2146	CHEMBL612426
82	RESISTANT Serratia marcescens	0.2132	CHEMBL614593
64	Streptococcus mutans	0.2131	CHEMBL612426
69	Streptococcus mutans	0.1964	CHEMBL612426
67	Streptococcus mutans	0.1963	CHEMBL612426
121	Streptococcus mutans	0.1932	CHEMBL612426
69	Bacillus subtilis subsp. subtilis str. 168	0.1832	CHEMBL613315
67	Bacillus subtilis subsp. subtilis str. 168	0.1826	CHEMBL613315
82	Parabacteroides merdae	0.1814	CHEMBL615057
82	Streptococcus mutans	0.1777	CHEMBL612426
107	Streptococcus mutans	0.1709	CHEMBL612426
126	Streptococcus mutans	0.1699	CHEMBL612426
127	Streptococcus mutans	0.1656	CHEMBL612426
81	Parabacteroides merdae	0.1593	CHEMBL615057
81	RESISTANT Serratia marcescens	0.1536	CHEMBL614593
68	Streptococcus mutans	0.1528	CHEMBL612426
82	Staphylococcus aureus subsp. aureus RN4220	0.1514	CHEMBL2366906
70	Streptococcus mutans	0.1508	CHEMBL612426
121	Parabacteroides merdae	0.1462	CHEMBL615057
82	Clostridium innocuum	0.1433	CHEMBL614761
126	Bacillus subtilis subsp. subtilis str. 168	0.1396	CHEMBL613315
64	Bacillus subtilis subsp. subtilis str. 168	0.1393	CHEMBL613315
121	Staphylococcus aureus subsp. aureus RN4220	0.1393	CHEMBL2366906
107	Bacillus subtilis subsp. subtilis str. 168	0.139	CHEMBL613315
82	Corynebacterium jeikeium	0.1372	CHEMBL613351
81	Staphylococcus aureus subsp. aureus RN4220	0.136	CHEMBL2366906
81	Prevotella disiens	0.1311	CHEMBL612235
82	Propionibacterium	0.1284	CHEMBL614980
64	Shigella sp.	0.1247	CHEMBL614397
82	Bacteroides ovatus	0.1211	CHEMBL612686
82	Prevotella corporis	0.1205	CHEMBL615061
82	Staphylococcus sciuri	0.1191	CHEMBL613150
81	Clostridium innocuum	0.115	CHEMBL614761
64	Staphylococcus aureus subsp. aureus RN4220	0.11	CHEMBL2366906
82	Porphyromonas asaccharolytica	0.1071	CHEMBL615058
127	Bacillus subtilis subsp. subtilis str. 168	0.1064	CHEMBL613315
81	Propionibacterium	0.1026	CHEMBL614980
82	Prevotella oralis	0.0954	CHEMBL612687
121	RESISTANT Staphylococcus simulans	0.0946	CHEMBL612425
48	Staphylococcus aureus subsp. aureus RN4220	0.0933	CHEMBL2366906
132	Staphylococcus aureus subsp. aureus RN4220	0.0907	CHEMBL2366906
82	Nocardia nova	0.0903	CHEMBL612977
81	Shigella sp.	0.0901	CHEMBL614397
121	Propionibacterium	0.09	CHEMBL614980
121	RESISTANT Serratia marcescens	0.0868	CHEMBL614593
81	Prevotella corporis	0.0849	CHEMBL615061
82	Yersinia pseudotuberculosis	0.0849	CHEMBL613185
121	Clostridium innocuum	0.0822	CHEMBL614761
82	Bacillus subtilis subsp. spizizenii ATCC 6633	0.0817	CHEMBL2367178
64	Actinomyces israelii	0.0764	CHEMBL614976
82	RESISTANT Pseudomonas aeruginosa	0.0762	CHEMBL348
82	Staphylococcus intermedius	0.0629	CHEMBL614422
116	Bacteroides stercoris	0.0605	CHEMBL614750
132	Bacteroides stercoris	0.0605	CHEMBL614750
70	Shigella sp.	0.0603	CHEMBL614397
82	RESISTANT Mycobacterium ulcerans	0.06	CHEMBL612965
64	Nocardia nova	0.0595	CHEMBL612977
82	Bacillus subtilis subsp. subtilis str. 168	0.0594	CHEMBL613315
82	Prevotella denticola	0.0584	CHEMBL615062
121	Prevotella disiens	0.0559	CHEMBL612235
48	RESISTANT Staphylococcus aureus subsp. aureus MW2	0.0537	CHEMBL612531
121	Listeria monocytogenes	0.0519	CHEMBL614974
121	Nocardia brasiliensis	0.0516	CHEMBL612976
70	Staphylococcus aureus subsp. aureus RN4220	0.0506	CHEMBL2366906
82	Clostridium sordellii	0.0494	CHEMBL613072
127	Mycobacterium tuberculosis H37Rv	0.0487	CHEMBL2111188
82	Bacillus	0.0479	CHEMBL612428
70	Staphylococcus intermedius	0.0462	CHEMBL614422
68	Staphylococcus aureus subsp. aureus RN4220	0.046	CHEMBL2366906
116	Staphylococcus aureus subsp. aureus RN4220	0.0441	CHEMBL2366906
81	Bacillus megaterium	0.0432	CHEMBL613071
81	Staphylococcus intermedius	0.0432	CHEMBL614422
81	Yersinia pseudotuberculosis	0.0412	CHEMBL613185
68	Shigella sp.	0.0394	CHEMBL614397
81	RESISTANT Pseudomonas aeruginosa	0.0392	CHEMBL348
126	Mycobacterium tuberculosis H37Rv	0.038	CHEMBL2111188
121	RESISTANT Mycobacterium ulcerans	0.0371	CHEMBL612965
82	Streptococcus oralis	0.0352	CHEMBL613305
64	Staphylococcus intermedius	0.0335	CHEMBL614422
81	Streptomyces coelicolor	0.0331	CHEMBL613092
81	Bacillus	0.0322	CHEMBL612428
116	Actinomyces israelii	0.0283	CHEMBL614976
132	Actinomyces israelii	0.0283	CHEMBL614976
48	RESISTANT Helicobacter pylori	0.0277	CHEMBL612600
81	Bacillus anthracis	0.0262	CHEMBL613904
81	RESISTANT Staphylococcus simulans	0.0255	CHEMBL612425
64	Clostridium septicum	0.0254	CHEMBL614968
81	Prevotella denticola	0.0212	CHEMBL615062
121	Staphylococcus sciuri	0.0209	CHEMBL613150
126	Staphylococcus aureus subsp. aureus RN4220	0.0208	CHEMBL2366906
48	Staphylococcus intermedius	0.0208	CHEMBL614422
68	Staphylococcus intermedius	0.0197	CHEMBL614422
121	RESISTANT Anaerococcus prevotii	0.0188	CHEMBL612351
82	RESISTANT Bacillus cereus	0.0185	CHEMBL613070
69	Mycobacterium tuberculosis H37Rv	0.0184	CHEMBL2111188
81	Listeria monocytogenes	0.0177	CHEMBL614974
64	Mycobacterium marinum	0.0167	CHEMBL614987
69	Staphylococcus intermedius	0.0166	CHEMBL614422
121	Bacteroides ovatus	0.016	CHEMBL612686
82	RESISTANT Staphylococcus aureus	0.0157	CHEMBL352
64	Clostridium cadaveris	0.0155	CHEMBL614970
81	RESISTANT Anaerococcus prevotii	0.0152	CHEMBL612351
70	Mycobacterium tuberculosis H37Rv	0.0151	CHEMBL2111188
107	Staphylococcus aureus subsp. aureus RN4220	0.015	CHEMBL2366906
48	Bacillus megaterium	0.014	CHEMBL613071
121	Bacillus megaterium	0.0139	CHEMBL613071
121	Shigella sp.	0.0134	CHEMBL614397
69	Staphylococcus aureus subsp. aureus RN4220	0.0129	CHEMBL2366906
121	Prevotella corporis	0.0128	CHEMBL615061
82	Bacteroides distasonis	0.0118	CHEMBL614413
81	RESISTANT Streptococcus agalactiae	0.011	CHEMBL614622
69	Bacillus megaterium	0.0109	CHEMBL613071
64	Bacillus subtilis subsp. spizizenii ATCC 6633	0.0106	CHEMBL2367178
81	Nocardia brasiliensis	0.0091	CHEMBL612976
64	RESISTANT Staphylococcus simulans	0.0078	CHEMBL612425
67	Staphylococcus aureus subsp. aureus RN4220	0.0071	CHEMBL2366906
81	Burkholderia pseudomallei	0.007	CHEMBL3140323
81	Bacteroides ovatus	0.0063	CHEMBL612686
64	Actinomyces naeslundii	0.0052	CHEMBL614975
82	RESISTANT Streptococcus agalactiae	0.0049	CHEMBL614622
121	Prevotella oralis	0.0034	CHEMBL612687
81	Clostridium sordellii	0.0017	CHEMBL613072
132	Kocuria rhizophila	0.0012	CHEMBL1075349
82	Clostridium clostridioforme	0.0008	CHEMBL614760

## Sheet: AntiFun
Compound	Name	Confidence	ChEMBL ID
82	Candida	0.0141	CHEMBL612867
81	Candida	0.1006	CHEMBL612867
132	Microsporum canis	0.0006	CHEMBL612335
116	Microsporum canis	0.0131	CHEMBL612335
64	Microsporum canis	0.0602	CHEMBL612335
121	Pichia jadinii	0.0186	CHEMBL612309
82	Pichia jadinii	0.0373	CHEMBL612309
81	Pichia jadinii	0.0601	CHEMBL612309
81	Saccharomyces cerevisiae	0.0401	CHEMBL361
116	Trichophyton mentagrophytes	0.0011	CHEMBL613162
64	Trichophyton mentagrophytes	0.1121	CHEMBL613162

## Sheet: acuRat-GUSAR
Compound	Quantittative assessments, mg/kg				Qualitative assessments, class
	IP	IV	Oral	SC	IP	IV	Oral	SC
64	809.8	402.5	1218	780.4*	5	5	4	4*
67	1263	466	843.9	440*	NT	5	4	4*
68	1266	502.2	469.2	477.7*	NT	5	4	4*
69	1282	448.5	1001	1588	NT	5	4	5
70	1299	476.5	732.3	545.4*	NT	5	4	4*
81	1033	236.6	593.7	1644*	5	4	4	5*
82	1061	287.2	720.000*	862.1*	5	4	4*	4*
107	1010*	371.9	192.400*	397.6*	5*	5	3*	4*
116	980.3	311.5	1325	619.9*	5	5	4	4*
121	1180*	210.7	765.100*	682*	5*	4	4*	4*
126	1258	381.6	196.200*	422*	NT	5	3*	4*
127	1031*	398.3	202.800*	442*	5*	5	3*	4*
132	680.4	309	1266	1434	5	5	4	5
48	890.4	476.1	933.3	660.6*	5	5	4	4*
